# Supplementary material for: Synthesis of Purine-Based Ionic Liquids and Their Applications
Source: MDPI journal article supplement (doi:10.3390/molecules26226958), 2021-11-18
Supplement: s1 [file s1]

## **Synthesis of purine-based ionic liquids and their applications**

Ana R. F. Carreira,<sup>a</sup> Telma Veloso,<sup>a,b</sup> Nicolas Schaeffer,<sup>a</sup> Joana L. Pereira,<sup>b</sup> Sónia P. M. Ventura,<sup>a</sup> Cécile Rizzi,<sup>c</sup> Juliette Sirieix Plénet,<sup>c</sup> Helena Passos,<sup>a\*</sup> João A. P. Coutinho<sup>a</sup>

<sup>a</sup>CICECO - Aveiro Institute of Materials, Department of Chemistry, University of Aveiro, 3810-193 Aveiro, Portugal

<sup>b</sup>Department of Biology & CESAM, University of Aveiro, Aveiro, Portugal

<sup>c</sup>Sorbonne Université, Laboratoire Physico-Chimie des Électrolytes et Nano-Systèmes Interfaciaux, PHENIX,-UMR 8234, F-75252, Paris Cedex 05, France

\*Corresponding author. Email: hpassos@ua.pt

## Nuclear magnetic resonance (NMR) characterization

### Tetrabutylammonium theobrominate, [N<sub>4444</sub>][Theob]:

<sup>1</sup>H NMR (D<sub>2</sub>O, 300 MHz, [ppm]): δ 0.78 (t,  $J_{HH}$  = 7.3 Hz, 12H, N<sup>+</sup>CH<sub>2</sub>CH<sub>2</sub>CH<sub>2</sub>CH<sub>3</sub>), 1.19 (sext,  $J_{HH}$  = 7.3 Hz, 8H, N<sup>+</sup>CH<sub>2</sub>CH<sub>2</sub>CH<sub>2</sub>CH<sub>3</sub>), 1.37 – 1.57 (m, 8H, N<sup>+</sup>CH<sub>2</sub>CH<sub>2</sub>CH<sub>2</sub>CH<sub>3</sub>), 2.89 – 3.12 (m, 8H, N<sup>+</sup>CH<sub>2</sub>CH<sub>2</sub>CH<sub>2</sub>CH<sub>3</sub>), 3.24 (s, 3H, -CONCH<sub>3</sub>-), 3.71 (s, 3H, -NCHCH<sub>3</sub>-), 7.49 (s, 1H, -NCHN-). <sup>13</sup>C NMR (D<sub>2</sub>O, 75.47 MHz, [ppm]): δ 12.8, 19.1, 23.0, 29.3, 33.2, 58.0, 109.6, 141.2, 149.9, 159.4, 165.1.

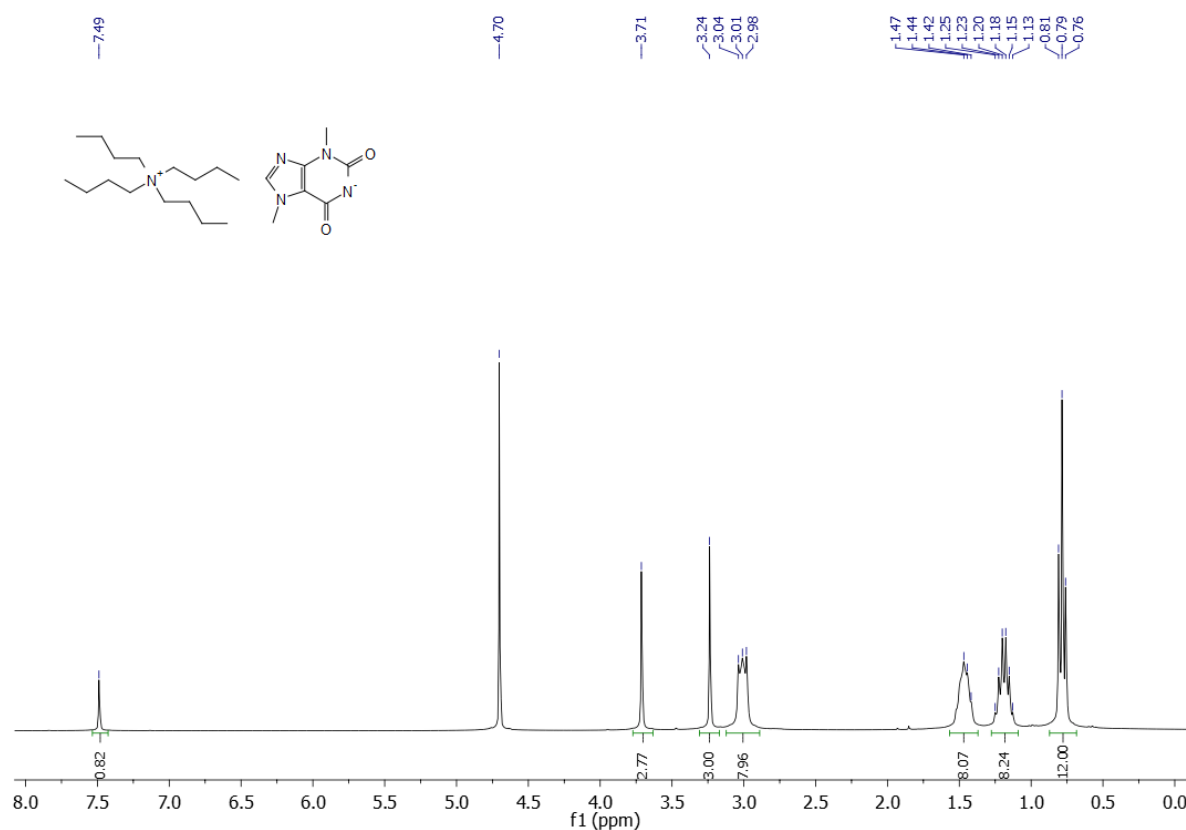

**Spectrum S1.** <sup>1</sup>H NMR spectra of [N<sub>4444</sub>][Theob] (D<sub>2</sub>O, 300 MHz).

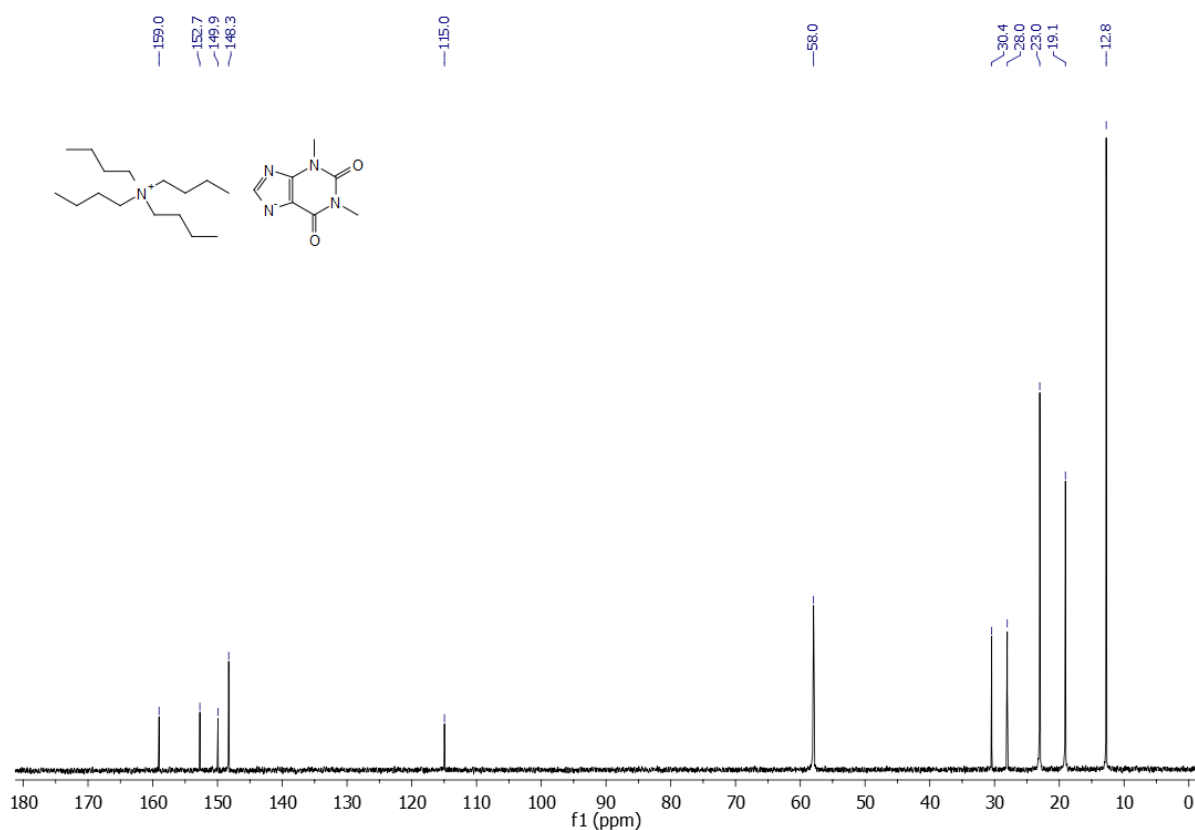

**Spectrum S2.**  $^{13}\text{C}$  NMR spectra of [N<sub>4444</sub>][Theob] (D<sub>2</sub>O, 75.47 MHz).

**Tetrabutylammonium theophyllinate, [N<sub>4444</sub>][Theop]:**

$^1\text{H}$  NMR (D<sub>2</sub>O, 300 MHz, [ppm]):  $\delta$  0.80 (t,  $J_{\text{HH}} = 7.3$  Hz, 12H,  $\text{N}^+\text{CH}_2\text{CH}_2\text{CH}_2\text{CH}_3$ ), 1.20 (sext,  $J_{\text{HH}} = 7.3$  Hz, 8H,  $\text{N}^+\text{CH}_2\text{CH}_2\text{CH}_2\text{CH}_3$ ), 1.23 – 1.51 (m, 8H,  $\text{N}^+\text{CH}_2\text{CH}_2\text{CH}_2\text{CH}_3$ ), 2.95 – 3.01 (m, 8H,  $\text{N}^+\text{CH}_2\text{CH}_2\text{CH}_2\text{CH}_3$ ), 3.20 (s, 3H,  $-\text{CON}(\text{CH}_3)\text{CO}-$ ), 3.36 (s, 3H,  $-\text{CON}(\text{CH}_3)\text{C}-$ ), 7.39 (s, 1H,  $-\text{NCHN}-$ ).  $^{13}\text{C}$  NMR (D<sub>2</sub>O, 75.47 MHz, [ppm]):  $\delta$  12.8, 19.1, 23.0, 28.0, 30.4, 58.0, 115.0, 148.3, 149.9, 152.7, 159.0.

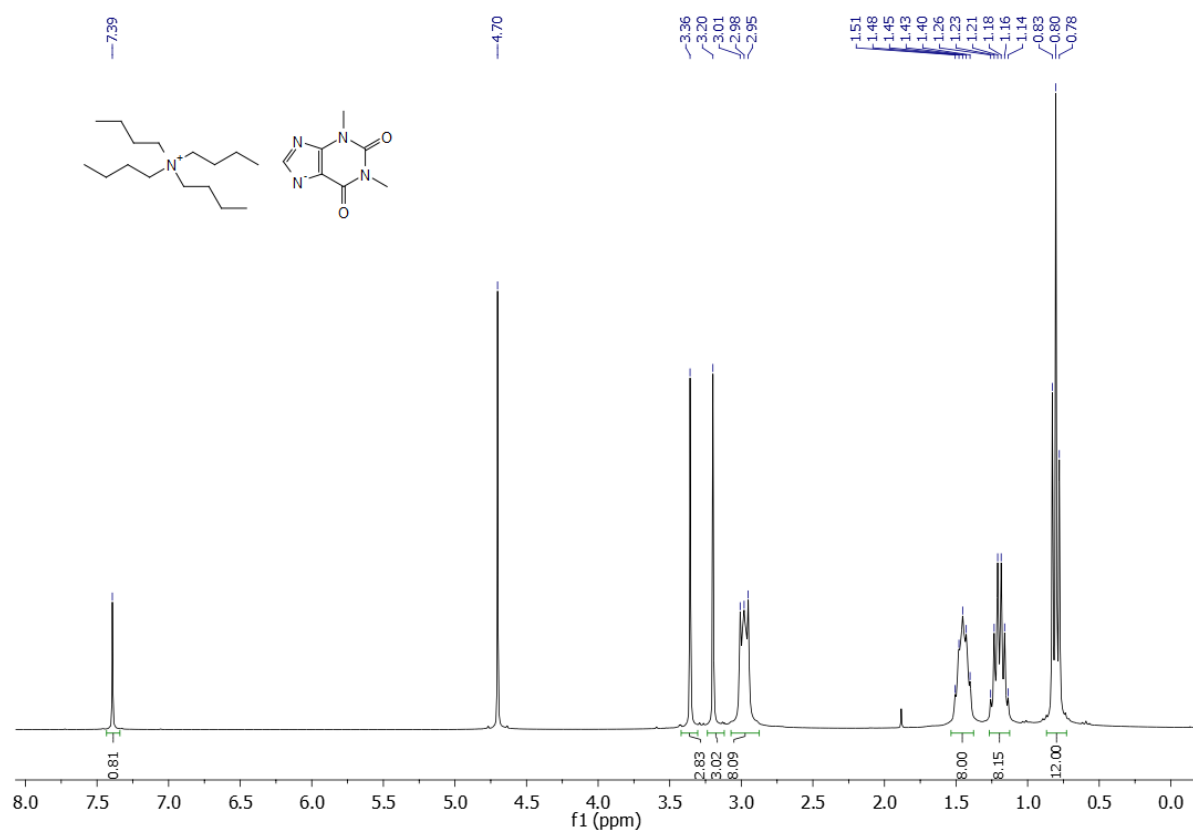

**Spectrum S3.** <sup>1</sup>H NMR spectra of [N<sub>4444</sub>][Theop] (D<sub>2</sub>O, 300 MHz).

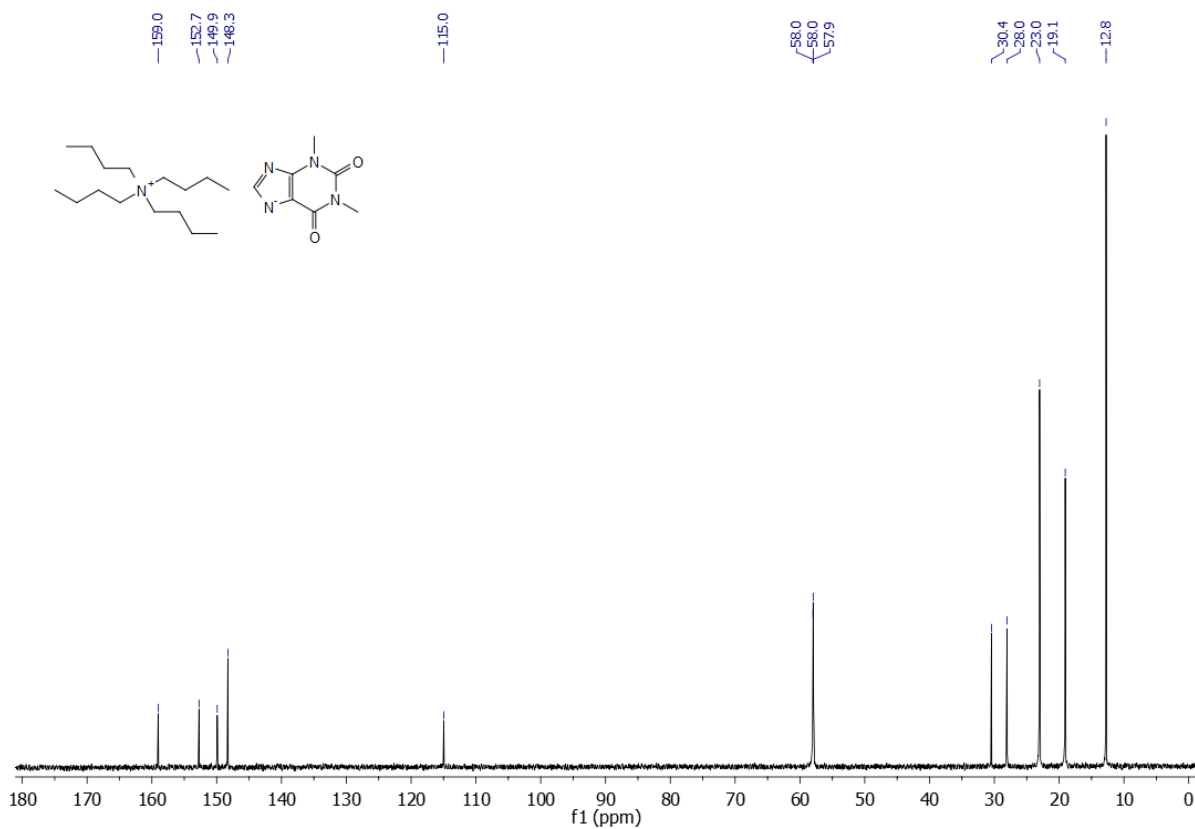

**Spectrum S4.** <sup>13</sup>C NMR spectra of [N<sub>4444</sub>][Theop] (D<sub>2</sub>O, 75.47 MHz).

**Tetrabutylammonium xanthinate, [N<sub>4444</sub>][Xan]:**

<sup>1</sup>H NMR (D<sub>2</sub>O, 300 MHz, [ppm]): δ 0.76 (t, *J*<sub>HH</sub> = 7.3 Hz, 12H, N<sup>+</sup>CH<sub>2</sub>CH<sub>2</sub>CH<sub>2</sub>CH<sub>3</sub>), 1.16 (sext, *J*<sub>HH</sub> = 7.3 Hz, 8H, N<sup>+</sup>CH<sub>2</sub>CH<sub>2</sub>CH<sub>2</sub>CH<sub>3</sub>), 1.37 – 1.47 (m, 8H, N<sup>+</sup>CH<sub>2</sub>CH<sub>2</sub>CH<sub>2</sub>CH<sub>3</sub>), 2.93 – 2.98 (m, 8H, N<sup>+</sup>CH<sub>2</sub>CH<sub>2</sub>CH<sub>2</sub>CH<sub>3</sub>), 7.57 (s, 1H, -NCHN-). <sup>13</sup>C NMR (D<sub>2</sub>O, 75.47 MHz, [ppm]): δ 12.7, 19.0, 23.0, 57.9, 113.3, 138.8, 154.3, 159.0, 160.4.

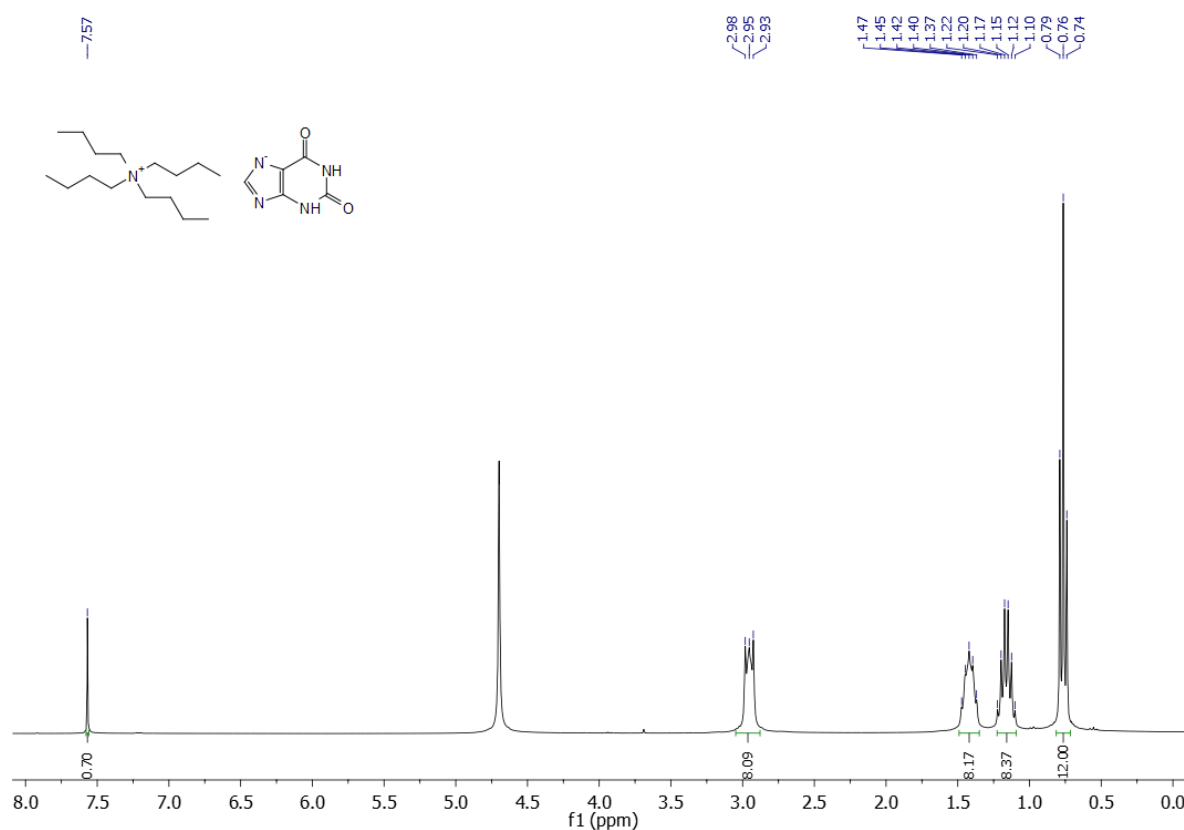

**Spectrum S5.** <sup>1</sup>H NMR spectra of [N<sub>4444</sub>][Xan] (D<sub>2</sub>O, 300 MHz).

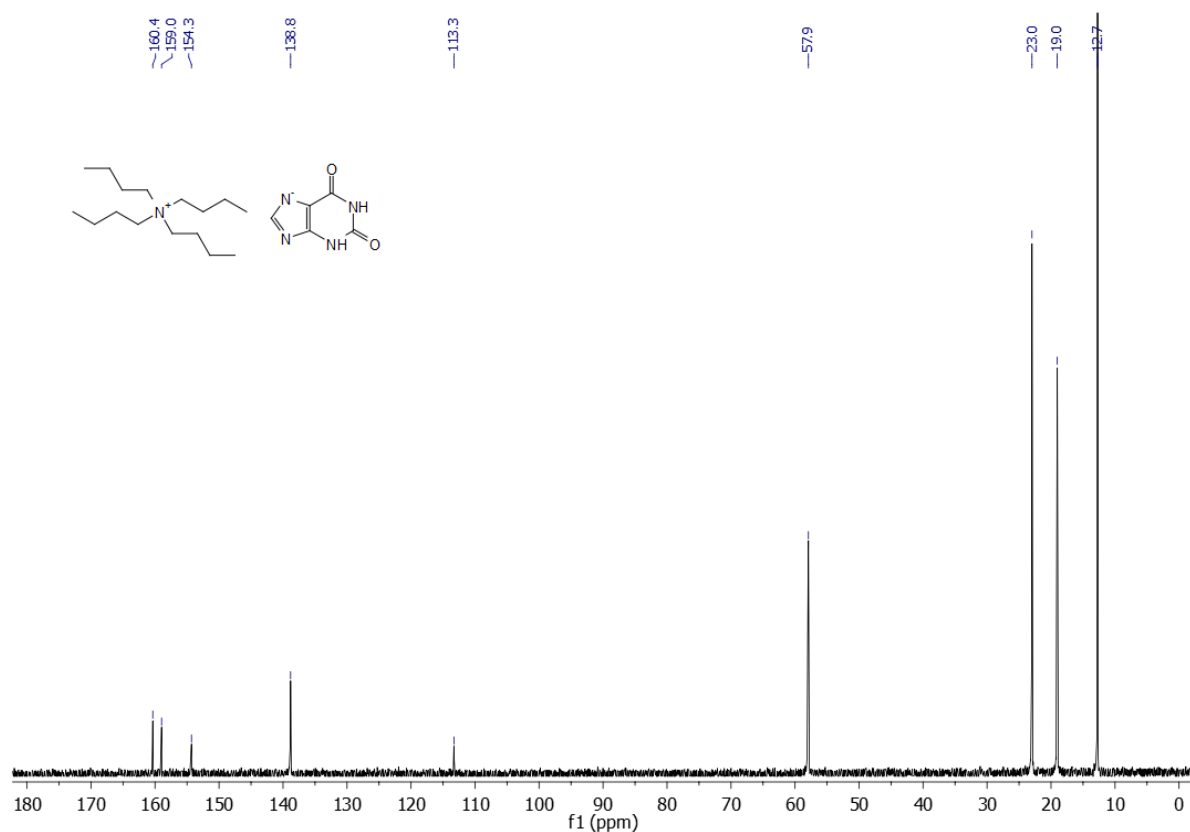

**Spectrum S6.**  $^{13}\text{C}$  NMR spectra of  $[\text{N}_{4444}][\text{Xan}]$  ( $\text{D}_2\text{O}$ , 75.47 MHz).

**Tetrabutylammonium urate,  $[\text{N}_{4444}][\text{Ur}]$ :**

$^1\text{H}$  NMR ( $\text{D}_2\text{O}$ , 300 MHz, [ppm]):  $\delta$  0.79 (t,  $J_{\text{HH}} = 7.3$  Hz, 12H,  $\text{N}^+\text{CH}_2\text{CH}_2\text{CH}_2\text{CH}_3$ ), 1.16 (sext,  $J_{\text{HH}} = 7.2$  Hz, 8H,  $\text{N}^+\text{CH}_2\text{CH}_2\text{CH}_2\text{CH}_3$ ), 1.46 (quint,  $J_{\text{HH}} = 15.4, 8.0$  Hz, 8H,  $\text{N}^+\text{CH}_2\text{CH}_2\text{CH}_2\text{CH}_3$ ), 2.97 – 3.03 (m, 8H,  $\text{N}^+\text{CH}_2\text{CH}_2\text{CH}_2\text{CH}_3$ ).  $^{13}\text{C}$  NMR ( $\text{D}_2\text{O}$ , 75.47 MHz, [ppm]):  $\delta$  12.7, 19.1, 23.0, 58.0, 98.6, 151.1, 154.8, 155.5, 158.8.

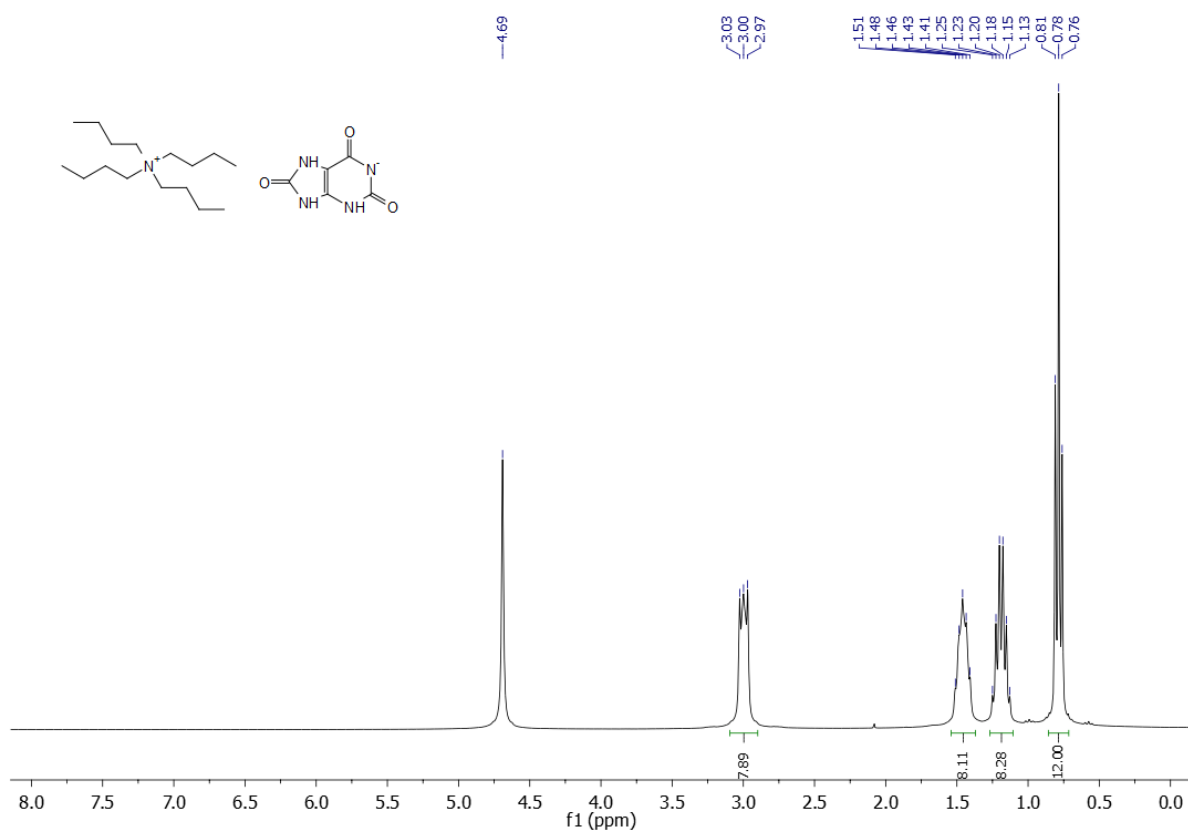

**Spectrum S7.**  $^1\text{H}$  NMR spectra of  $[\text{N}_{4444}][\text{Ur}]$  ( $\text{D}_2\text{O}$ , 300 MHz).

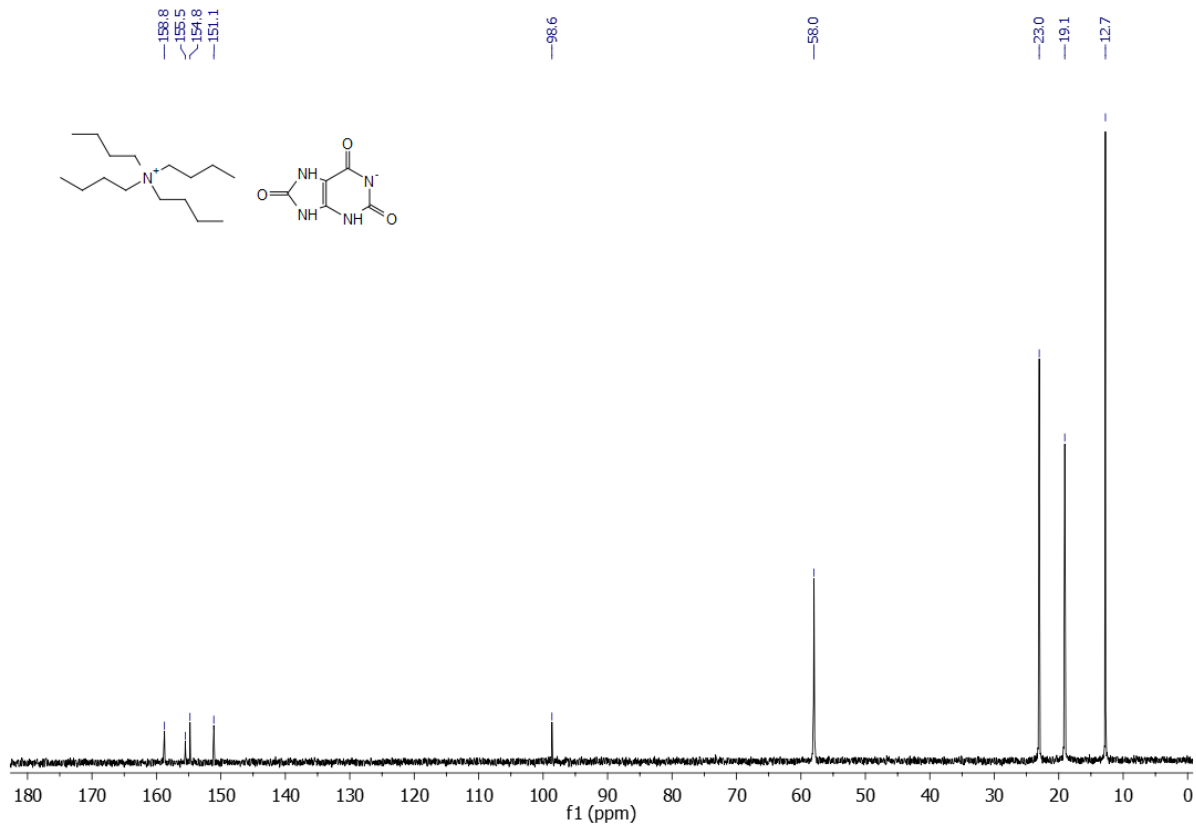

**Spectrum S8.**  $^{13}\text{C}$  NMR spectra of  $[\text{N}_{4444}][\text{Ur}]$  ( $\text{D}_2\text{O}$ , 75.47 MHz).

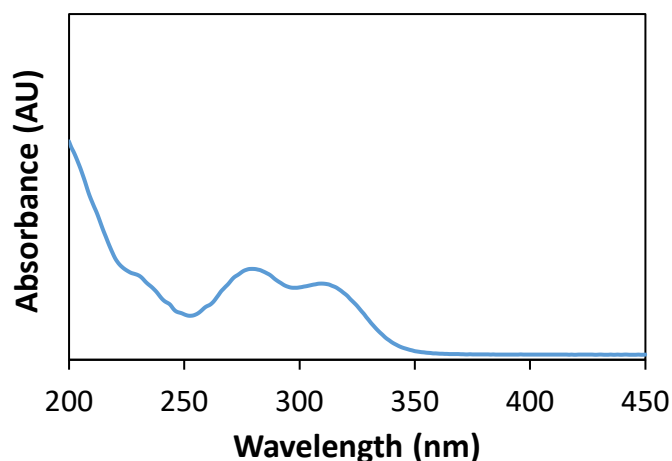

**Figure S1.** Ferulic acid absorbance spectrum in an aqueous solution of  $[N_{4444}][\text{Theob}]$  at  $0.5 \text{ mol}\cdot\text{L}^{-1}$ .

**Table S1.** Molar water-solubility ( $S$ ) of the purine-based ILs, pH of the saturated IL solution at  $(298 \pm 1) \text{ K}$  and molar water-solubility of their respective purines ( $S_0$ ).

| IL                         | $S \pm \sigma \text{ (mol}\cdot\text{L}^{-1})$ | pH saturated | Purine       | $S_0 \text{ (mol}\cdot\text{L}^{-1})^{[a]}$ |
|----------------------------|------------------------------------------------|--------------|--------------|---------------------------------------------|
| $[N_{4444}][\text{Theob}]$ | $1.59 \pm 0.07$                                | 12.76        | Theobromine  | $1.83 \times 10^{-3} \text{ [b]}$           |
| $[N_{4444}][\text{Theop}]$ | $2.2 \pm 0.1$                                  | 10.89        | Theophylline | $4.09 \times 10^{-2} \text{ [b]}$           |
| $[N_{4444}][\text{Xan}]$   | $0.17 \pm 0.01$                                | 10.14        | Xanthine     | $4.60 \times 10^{-4} \text{ [c]}$           |
| $[N_{4444}][\text{Ur}]$    | $0.096 \pm 0.007$                              | 8.31         | Uric acid    | $3.57 \times 10^{-4} \text{ [d]}$           |

[a] Data from PubChem [1]. [b] Solubility measured at  $(298 \pm 1) \text{ K}$ . [c] Solubility determined at  $(289 \pm 1) \text{ K}$ . [d] Solubility determined at  $(293 \pm 1) \text{ K}$ .

**Table S2.** Molar solubility ( $S$ ) of sodium theophyllinate in an aqueous solution of  $[N_{4444}]\text{Cl}$  ( $1.0 \text{ mol}\cdot\text{L}^{-1}$ ) and in pure water ( $S_0$ ) and its molar aqueous solubility enhancement ( $S/S_0$ ). The pH of the initial aqueous solution of  $[N_{4444}]\text{Cl}$  and of the final saturated solution are also shown.

| $S \pm \sigma \text{ (mol}\cdot\text{L}^{-1})$ | $S_0 \pm \sigma \text{ (mol}\cdot\text{L}^{-1})$ | $S/S_0$ | pH initial | pH saturated |
|------------------------------------------------|--------------------------------------------------|---------|------------|--------------|
| $0.30 \pm 0.02$                                | $0.26 \pm 0.01$                                  | 1.13    | 4.23       | 10.55        |

**Table S3.** EC<sub>50</sub> values (mg·L<sup>-1</sup>) of the purine-based ILs and [N<sub>4444</sub>]Cl, after 96 h of incubation with the microalgae *Raphidocelis subcapitata* and the logarithm function of their anion octanol-water partition coefficient, log (K<sub>ow</sub>). The respective 95% confidence limits are presented in the parenthesis.

| IL                          | EC <sub>50</sub> / (mg·L <sup>-1</sup> )<br>(lower limit; upper limit) | log (K <sub>ow</sub> ) <sup>[a]</sup> |
|-----------------------------|------------------------------------------------------------------------|---------------------------------------|
| [N <sub>4444</sub> ][Theob] | 2.6<br>(1.8; 3.3)                                                      | -3.17                                 |
| [N <sub>4444</sub> ][Theop] | 3.7<br>(1.4; 5.9)                                                      | -2.12                                 |
| [N <sub>4444</sub> ][Xan]   | 0.8<br>(0.7; 1.0)                                                      | -1.49                                 |
| [N <sub>4444</sub> ][Ur]    | 2.7<br>(1.6; 3.7)                                                      | -2.75                                 |
| [N <sub>4444</sub> ]Cl      | 2.6<br>(2.0; 3.1)                                                      | 0.96                                  |

<sup>[a]</sup> Data from Marvin 21.14 [2].

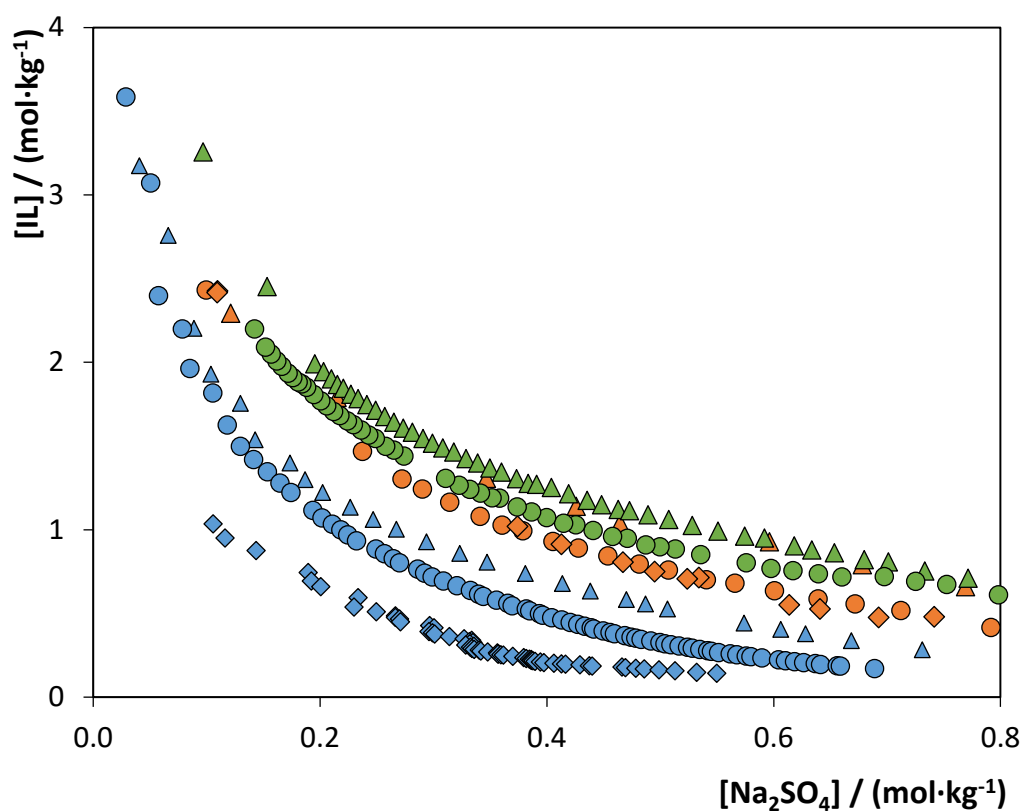

**Figure S2.** Binodal curves of the ternary systems composed of  $[N_{4444}][\text{Theop}]$  (blue),  $[N_{4444}][\text{Theob}]$  (orange) or  $[N_{4444}]\text{Cl}$  (green), water and  $\text{Na}_2\text{SO}_4$  at 298 K ( $\Delta$ ), 323 K ( $\circ$ ) or 353 K ( $\diamond$ ) ( $\pm 1$  K) and atmospheric pressure (0.1 MPa).  $[N_{4444}]\text{Cl}$  was not tested at  $(353 \pm 1)$  K.

**Table S4.** Experimental weight fraction of the ternary systems composed of IL, water and Na<sub>2</sub>SO<sub>4</sub> at (298 ± 1) K and atmospheric pressure (0.1 MPa).

| [N <sub>4444</sub> ]Cl      |                                       |          |                                       |          |                                       |
|-----------------------------|---------------------------------------|----------|---------------------------------------|----------|---------------------------------------|
| IL (wt%)                    | Na <sub>2</sub> SO <sub>4</sub> (wt%) | IL (wt%) | Na <sub>2</sub> SO <sub>4</sub> (wt%) | IL (wt%) | Na <sub>2</sub> SO <sub>4</sub> (wt%) |
| 47.51                       | 1.36                                  | 29.65    | 4.07                                  | 23.25    | 6.50                                  |
| 40.54                       | 2.13                                  | 29.27    | 4.19                                  | 22.76    | 6.72                                  |
| 35.63                       | 2.70                                  | 28.92    | 4.32                                  | 22.19    | 6.98                                  |
| 35.08                       | 2.80                                  | 28.38    | 4.46                                  | 21.59    | 7.25                                  |
| 34.56                       | 2.89                                  | 28.00    | 4.59                                  | 21.08    | 7.54                                  |
| 34.17                       | 2.97                                  | 27.55    | 4.73                                  | 20.89    | 7.75                                  |
| 33.90                       | 3.04                                  | 27.21    | 4.86                                  | 20.07    | 8.07                                  |
| 33.46                       | 3.13                                  | 26.62    | 5.03                                  | 19.64    | 8.25                                  |
| 33.13                       | 3.21                                  | 26.18    | 5.16                                  | 19.31    | 8.49                                  |
| 32.68                       | 3.31                                  | 26.09    | 5.26                                  | 18.59    | 8.80                                  |
| 32.27                       | 3.41                                  | 25.83    | 5.42                                  | 18.32    | 9.06                                  |
| 31.79                       | 3.52                                  | 25.25    | 5.62                                  | 17.31    | 9.43                                  |
| 31.35                       | 3.63                                  | 24.61    | 5.82                                  | 16.48    | 9.88                                  |
| 30.88                       | 3.74                                  | 24.21    | 5.99                                  | 16.32    | 10.39                                 |
| 30.55                       | 3.84                                  | 23.75    | 6.17                                  |          |                                       |
| [N <sub>4444</sub> ][Theob] |                                       |          |                                       |          |                                       |
| IL (wt%)                    | Na <sub>2</sub> SO <sub>4</sub> (wt%) | IL (wt%) | Na <sub>2</sub> SO <sub>4</sub> (wt%) | IL (wt%) | Na <sub>2</sub> SO <sub>4</sub> (wt%) |
| 49.16                       | 1.69                                  | 30.46    | 6.19                                  | 20.45    | 10.44                                 |
| 43.02                       | 2.96                                  | 28.10    | 7.81                                  | 18.05    | 11.36                                 |
| 35.51                       | 4.69                                  | 25.01    | 8.79                                  | 17.09    | 11.98                                 |
| 32.45                       | 5.70                                  | 21.76    | 9.85                                  | 15.88    | 12.68                                 |
| [N <sub>4444</sub> ][Theop] |                                       |          |                                       |          |                                       |
| IL (wt%)                    | Na <sub>2</sub> SO <sub>4</sub> (wt%) | IL (wt%) | Na <sub>2</sub> SO <sub>4</sub> (wt%) | IL (wt%) | Na <sub>2</sub> SO <sub>4</sub> (wt%) |
| 57.24                       | 0.57                                  | 32.35    | 3.12                                  | 19.72    | 6.26                                  |
| 53.77                       | 0.93                                  | 30.92    | 3.38                                  | 19.01    | 6.47                                  |
| 48.17                       | 1.24                                  | 29.70    | 3.66                                  | 18.15    | 6.71                                  |
| 44.85                       | 1.45                                  | 28.14    | 4.00                                  | 15.73    | 7.53                                  |
| 42.53                       | 1.81                                  | 26.57    | 4.39                                  | 14.56    | 7.93                                  |
| 39.33                       | 1.99                                  | 25.35    | 4.70                                  | 13.77    | 8.19                                  |
| 37.09                       | 2.40                                  | 23.76    | 5.13                                  | 12.46    | 8.67                                  |
| 35.38                       | 2.58                                  | 22.23    | 5.55                                  | 10.63    | 9.41                                  |
| 34.02                       | 2.79                                  | 21.06    | 5.86                                  |          |                                       |

**Table S5.** Experimental weight fraction of the ternary systems composed of IL, water and Na<sub>2</sub>SO<sub>4</sub> at (323 ± 1) K and atmospheric pressure (0.1 MPa).

| [N <sub>4444</sub> ]Cl |                                       |          |                                       |          |                                       |
|------------------------|---------------------------------------|----------|---------------------------------------|----------|---------------------------------------|
| IL (wt%)               | Na <sub>2</sub> SO <sub>4</sub> (wt%) | IL (wt%) | Na <sub>2</sub> SO <sub>4</sub> (wt%) | IL (wt%) | Na <sub>2</sub> SO <sub>4</sub> (wt%) |
| 37.93                  | 1.98                                  | 30.33    | 3.33                                  | 20.86    | 6.27                                  |
| 36.75                  | 2.11                                  | 30.03    | 3.41                                  | 20.17    | 6.47                                  |
| 36.28                  | 2.18                                  | 29.41    | 3.53                                  | 19.98    | 6.63                                  |
| 35.81                  | 2.25                                  | 29.09    | 3.63                                  | 19.75    | 6.79                                  |
| 35.45                  | 2.31                                  | 28.58    | 3.74                                  | 19.11    | 7.07                                  |

|                                  |                                           |                 |                                           |                 |                                           |
|----------------------------------|-------------------------------------------|-----------------|-------------------------------------------|-----------------|-------------------------------------------|
| 34.98                            | 2.38                                      | 26.65           | 4.23                                      | 18.23           | 7.56                                      |
| 34.66                            | 2.44                                      | 26.01           | 4.38                                      | 17.60           | 7.82                                      |
| 34.35                            | 2.50                                      | 25.65           | 4.50                                      | 17.33           | 8.05                                      |
| 34.21                            | 2.54                                      | 25.29           | 4.62                                      | 16.99           | 8.33                                      |
| 33.95                            | 2.60                                      | 24.87           | 4.76                                      | 16.68           | 9.01                                      |
| 33.43                            | 2.69                                      | 24.84           | 4.84                                      | 16.64           | 8.57                                      |
| 32.98                            | 2.77                                      | 24.01           | 5.04                                      | 16.14           | 9.34                                      |
| 32.60                            | 2.84                                      | 23.50           | 5.20                                      | 15.73           | 9.66                                      |
| 32.17                            | 2.92                                      | 22.95           | 5.37                                      | 14.51           | 10.18                                     |
| 31.85                            | 3.00                                      | 22.41           | 5.56                                      | 14.03           | 10.57                                     |
| 31.45                            | 3.08                                      | 22.23           | 5.70                                      | 13.43           | 11.07                                     |
| 31.15                            | 3.15                                      | 21.68           | 5.89                                      |                 |                                           |
| 30.71                            | 3.24                                      | 21.07           | 6.11                                      |                 |                                           |
| <b>[N<sub>4444</sub>][Theob]</b> |                                           |                 |                                           |                 |                                           |
| <b>IL (wt%)</b>                  | <b>Na<sub>2</sub>SO<sub>4</sub> (wt%)</b> | <b>IL (wt%)</b> | <b>Na<sub>2</sub>SO<sub>4</sub> (wt%)</b> | <b>IL (wt%)</b> | <b>Na<sub>2</sub>SO<sub>4</sub> (wt%)</b> |
| 50.64                            | 1.40                                      | 28.17           | 5.44                                      | 19.84           | 8.32                                      |
| 38.22                            | 3.26                                      | 27.28           | 5.73                                      | 18.99           | 8.71                                      |
| 35.46                            | 3.72                                      | 26.23           | 6.05                                      | 17.88           | 9.19                                      |
| 34.38                            | 3.96                                      | 25.08           | 6.40                                      | 14.94           | 10.11                                     |
| 32.92                            | 4.27                                      | 24.22           | 6.72                                      | 13.81           | 10.69                                     |
| 31.27                            | 4.62                                      | 22.83           | 7.13                                      | 12.44           | 11.33                                     |
| 30.21                            | 4.87                                      | 22.27           | 7.44                                      |                 |                                           |
| 29.51                            | 5.10                                      | 21.13           | 7.86                                      |                 |                                           |
| <b>[N<sub>4444</sub>][Theop]</b> |                                           |                 |                                           |                 |                                           |
| <b>IL (wt%)</b>                  | <b>Na<sub>2</sub>SO<sub>4</sub> (wt%)</b> | <b>IL (wt%)</b> | <b>Na<sub>2</sub>SO<sub>4</sub> (wt%)</b> | <b>IL (wt%)</b> | <b>Na<sub>2</sub>SO<sub>4</sub> (wt%)</b> |
| 60.19                            | 0.40                                      | 22.63           | 4.20                                      | 12.67           | 6.42                                      |
| 56.43                            | 0.71                                      | 21.91           | 4.35                                      | 12.36           | 6.53                                      |
| 50.28                            | 0.81                                      | 21.16           | 4.51                                      | 12.07           | 6.63                                      |
| 48.11                            | 1.10                                      | 20.60           | 4.60                                      | 11.86           | 6.68                                      |
| 45.30                            | 1.19                                      | 20.22           | 4.66                                      | 11.63           | 6.75                                      |
| 43.38                            | 1.47                                      | 19.62           | 4.81                                      | 11.38           | 6.83                                      |
| 40.66                            | 1.65                                      | 19.09           | 4.93                                      | 11.12           | 6.93                                      |
| 38.71                            | 1.81                                      | 18.71           | 4.98                                      | 10.93           | 6.98                                      |
| 37.43                            | 1.97                                      | 18.16           | 5.14                                      | 10.70           | 7.06                                      |
| 36.22                            | 2.13                                      | 17.87           | 5.18                                      | 10.48           | 7.14                                      |
| 35.04                            | 2.28                                      | 17.37           | 5.29                                      | 10.32           | 7.18                                      |
| 34.01                            | 2.41                                      | 17.07           | 5.33                                      | 10.10           | 7.26                                      |
| 31.98                            | 2.67                                      | 16.65           | 5.43                                      | 9.81            | 7.39                                      |
| 31.11                            | 2.78                                      | 16.24           | 5.54                                      | 9.62            | 7.46                                      |
| 30.35                            | 2.90                                      | 15.85           | 5.63                                      | 9.39            | 7.56                                      |
| 29.62                            | 3.01                                      | 15.50           | 5.72                                      | 9.22            | 7.61                                      |
| 28.99                            | 3.09                                      | 15.16           | 5.80                                      | 8.97            | 7.73                                      |
| 28.23                            | 3.19                                      | 14.85           | 5.87                                      | 8.56            | 7.90                                      |
| 27.19                            | 3.42                                      | 14.64           | 5.90                                      | 8.39            | 7.98                                      |
| 26.51                            | 3.52                                      | 14.29           | 6.00                                      | 8.18            | 8.07                                      |
| 25.85                            | 3.62                                      | 14.01           | 6.08                                      | 7.98            | 8.17                                      |
| 25.27                            | 3.69                                      | 13.77           | 6.13                                      | 7.75            | 8.29                                      |
| 24.36                            | 3.90                                      | 13.39           | 6.24                                      | 7.61            | 8.35                                      |
| 23.77                            | 3.99                                      | 13.12           | 6.31                                      | 7.32            | 8.52                                      |

|       |      |       |      |      |      |
|-------|------|-------|------|------|------|
| 23.24 | 4.07 | 12.91 | 6.36 | 7.21 | 8.56 |
|-------|------|-------|------|------|------|

**Table S6.** Experimental weight fraction of the ternary systems composed of IL, water and Na<sub>2</sub>SO<sub>4</sub> at (353 ± 1) K.

| [N <sub>4444</sub> ][Theob] |                                       |          |                                       |          |                                       |
|-----------------------------|---------------------------------------|----------|---------------------------------------|----------|---------------------------------------|
| IL (wt%)                    | Na <sub>2</sub> SO <sub>4</sub> (wt%) | IL (wt%) | Na <sub>2</sub> SO <sub>4</sub> (wt%) | IL (wt%) | Na <sub>2</sub> SO <sub>4</sub> (wt%) |
| 50.57                       | 1.53                                  | 22.93    | 6.92                                  | 11.01    | 11.29                                 |
| 50.47                       | 1.53                                  | 23.14    | 7.05                                  | 6.14     | 12.55                                 |
| 30.07                       | 5.04                                  | 18.83    | 8.02                                  | 4.60     | 13.40                                 |
| 27.80                       | 5.54                                  | 18.18    | 8.34                                  | 1.80     | 15.24                                 |
| 25.35                       | 6.22                                  | 16.71    | 8.96                                  | 0.78     | 16.98                                 |
| 24.03                       | 6.57                                  | 16.81    | 9.53                                  |          |                                       |
| [N <sub>4444</sub> ][Theop] |                                       |          |                                       |          |                                       |
| IL (wt%)                    | Na <sub>2</sub> SO <sub>4</sub> (wt%) | IL (wt%) | Na <sub>2</sub> SO <sub>4</sub> (wt%) | IL (wt%) | Na <sub>2</sub> SO <sub>4</sub> (wt%) |
| 60.19                       | 0.40                                  | 21.91    | 4.35                                  | 12.07    | 6.63                                  |
| 56.43                       | 0.71                                  | 21.16    | 4.51                                  | 11.86    | 6.68                                  |
| 50.28                       | 0.81                                  | 20.60    | 4.60                                  | 11.63    | 6.75                                  |
| 48.11                       | 1.10                                  | 20.22    | 4.66                                  | 11.38    | 6.83                                  |
| 45.30                       | 1.19                                  | 19.62    | 4.81                                  | 11.12    | 6.93                                  |
| 43.38                       | 1.47                                  | 19.09    | 4.93                                  | 10.93    | 6.98                                  |
| 40.66                       | 1.65                                  | 18.71    | 4.98                                  | 10.70    | 7.06                                  |
| 38.71                       | 1.81                                  | 18.16    | 5.14                                  | 10.48    | 7.14                                  |
| 37.43                       | 1.97                                  | 17.87    | 5.18                                  | 10.32    | 7.18                                  |
| 36.22                       | 2.13                                  | 17.37    | 5.29                                  | 10.10    | 7.26                                  |
| 35.04                       | 2.28                                  | 17.07    | 5.33                                  | 9.81     | 7.39                                  |
| 34.01                       | 2.41                                  | 16.65    | 5.43                                  | 9.62     | 7.46                                  |
| 31.98                       | 2.67                                  | 16.24    | 5.54                                  | 9.39     | 7.56                                  |
| 31.11                       | 2.78                                  | 15.85    | 5.63                                  | 9.22     | 7.61                                  |
| 30.35                       | 2.90                                  | 15.50    | 5.72                                  | 8.97     | 7.73                                  |
| 29.62                       | 3.01                                  | 15.16    | 5.80                                  | 8.56     | 7.90                                  |
| 28.99                       | 3.09                                  | 14.85    | 5.87                                  | 8.39     | 7.98                                  |
| 28.23                       | 3.19                                  | 14.64    | 5.90                                  | 8.18     | 8.07                                  |
| 27.19                       | 3.42                                  | 14.29    | 6.00                                  | 7.98     | 8.17                                  |
| 26.51                       | 3.52                                  | 14.01    | 6.08                                  | 7.75     | 8.29                                  |
| 25.85                       | 3.62                                  | 13.77    | 6.13                                  | 7.61     | 8.35                                  |
| 25.27                       | 3.69                                  | 13.39    | 6.24                                  | 7.32     | 8.52                                  |
| 24.36                       | 3.90                                  | 13.12    | 6.31                                  | 7.21     | 8.56                                  |
| 23.77                       | 3.99                                  | 12.91    | 6.36                                  | 6.70     | 8.91                                  |
| 23.24                       | 4.07                                  | 12.67    | 6.42                                  |          |                                       |
| 22.63                       | 4.20                                  | 12.36    | 6.53                                  |          |                                       |

**Table S7.** Experimental weight fraction of the ternary systems composed of IL, water and K<sub>3</sub>C<sub>6</sub>H<sub>5</sub>O<sub>7</sub> at (298 ± 1) K.

| [N <sub>4444</sub> ][Theob] |                                                                   |          |                                                                   |          |                                                                   |
|-----------------------------|-------------------------------------------------------------------|----------|-------------------------------------------------------------------|----------|-------------------------------------------------------------------|
| IL (wt%)                    | K <sub>3</sub> C <sub>6</sub> H <sub>5</sub> O <sub>7</sub> (wt%) | IL (wt%) | K <sub>3</sub> C <sub>6</sub> H <sub>5</sub> O <sub>7</sub> (wt%) | IL (wt%) | K <sub>3</sub> C <sub>6</sub> H <sub>5</sub> O <sub>7</sub> (wt%) |
| 53.97                       | 5.53                                                              | 34.98    | 13.12                                                             | 18.96    | 23.48                                                             |

| 53.10                       | 5.44                                                              | 33.07    | 14.58                                                             | 18.87    | 23.35                                                             |
|-----------------------------|-------------------------------------------------------------------|----------|-------------------------------------------------------------------|----------|-------------------------------------------------------------------|
| 51.23                       | 6.66                                                              | 32.67    | 14.40                                                             | 17.63    | 24.44                                                             |
| 49.87                       | 6.48                                                              | 32.13    | 14.82                                                             | 17.56    | 24.35                                                             |
| 48.08                       | 7.68                                                              | 31.82    | 14.68                                                             | 16.78    | 25.05                                                             |
| 47.39                       | 7.57                                                              | 30.32    | 15.87                                                             | 16.67    | 24.89                                                             |
| 46.58                       | 8.13                                                              | 30.11    | 15.76                                                             | 15.15    | 26.26                                                             |
| 45.95                       | 8.01                                                              | 28.83    | 16.78                                                             | 15.08    | 26.14                                                             |
| 44.56                       | 8.98                                                              | 28.52    | 16.60                                                             | 14.03    | 27.10                                                             |
| 43.90                       | 8.84                                                              | 25.99    | 18.66                                                             | 13.97    | 26.99                                                             |
| 42.39                       | 9.92                                                              | 25.80    | 18.53                                                             | 13.07    | 27.83                                                             |
| 41.72                       | 9.76                                                              | 24.42    | 19.68                                                             | 13.02    | 27.73                                                             |
| 39.96                       | 11.03                                                             | 24.20    | 19.51                                                             | 12.07    | 28.62                                                             |
| 39.42                       | 10.88                                                             | 21.90    | 21.45                                                             | 12.02    | 28.51                                                             |
| 37.74                       | 12.12                                                             | 21.80    | 21.35                                                             | 10.90    | 29.58                                                             |
| 37.20                       | 11.95                                                             | 20.90    | 22.12                                                             | 10.85    | 29.46                                                             |
| 35.43                       | 13.28                                                             | 20.74    | 21.94                                                             |          |                                                                   |
| [N <sub>4444</sub> ][Theop] |                                                                   |          |                                                                   |          |                                                                   |
| IL (wt%)                    | K <sub>3</sub> C <sub>6</sub> H <sub>5</sub> O <sub>7</sub> (wt%) | IL (wt%) | K <sub>3</sub> C <sub>6</sub> H <sub>5</sub> O <sub>7</sub> (wt%) | IL (wt%) | K <sub>3</sub> C <sub>6</sub> H <sub>5</sub> O <sub>7</sub> (wt%) |
| 59.93                       | 0.82                                                              | 17.98    | 11.66                                                             | 10.85    | 15.10                                                             |
| 55.87                       | 1.77                                                              | 17.72    | 11.80                                                             | 10.75    | 15.16                                                             |
| 49.96                       | 2.53                                                              | 17.38    | 11.90                                                             | 10.60    | 15.31                                                             |
| 45.22                       | 3.17                                                              | 17.02    | 12.19                                                             | 10.50    | 15.37                                                             |
| 42.63                       | 3.77                                                              | 16.68    | 12.13                                                             | 10.37    | 15.48                                                             |
| 39.83                       | 4.30                                                              | 16.38    | 12.32                                                             | 10.23    | 15.55                                                             |
| 37.83                       | 4.83                                                              | 16.14    | 12.42                                                             | 10.11    | 15.61                                                             |
| 36.10                       | 5.20                                                              | 15.70    | 12.67                                                             | 10.10    | 15.69                                                             |
| 35.05                       | 5.59                                                              | 15.38    | 12.70                                                             | 10.00    | 15.71                                                             |
| 33.54                       | 5.94                                                              | 15.14    | 12.84                                                             | 9.86     | 15.83                                                             |
| 32.60                       | 6.33                                                              | 14.92    | 12.97                                                             | 9.78     | 16.05                                                             |
| 31.25                       | 6.60                                                              | 14.70    | 13.08                                                             | 9.34     | 16.32                                                             |
| 30.46                       | 6.89                                                              | 14.51    | 13.16                                                             | 9.02     | 16.59                                                             |
| 29.67                       | 7.26                                                              | 14.31    | 13.25                                                             | 8.79     | 16.83                                                             |
| 28.54                       | 7.53                                                              | 14.10    | 13.37                                                             | 8.60     | 17.09                                                             |
| 27.86                       | 7.82                                                              | 13.92    | 13.47                                                             | 8.23     | 17.38                                                             |
| 27.20                       | 8.10                                                              | 13.73    | 13.58                                                             | 8.07     | 17.86                                                             |
| 26.47                       | 8.32                                                              | 13.48    | 13.60                                                             | 7.86     | 18.33                                                             |
| 25.85                       | 8.62                                                              | 13.31    | 13.70                                                             | 7.59     | 18.87                                                             |
| 25.04                       | 8.78                                                              | 13.08    | 13.93                                                             | 7.27     | 19.28                                                             |
| 24.48                       | 9.05                                                              | 12.93    | 14.00                                                             | 6.85     | 19.70                                                             |
| 23.59                       | 9.40                                                              | 12.62    | 14.17                                                             | 6.48     | 20.11                                                             |
| 22.68                       | 9.75                                                              | 12.48    | 14.25                                                             | 6.28     | 20.66                                                             |
| 22.17                       | 9.88                                                              | 12.33    | 14.34                                                             | 6.04     | 21.41                                                             |
| 21.75                       | 10.09                                                             | 12.20    | 14.41                                                             | 5.63     | 21.88                                                             |
| 21.32                       | 10.30                                                             | 11.96    | 14.55                                                             | 5.43     | 22.48                                                             |
| 20.76                       | 10.41                                                             | 11.70    | 14.69                                                             | 5.05     | 23.04                                                             |
| 20.31                       | 10.71                                                             | 11.57    | 14.75                                                             | 4.33     | 23.61                                                             |
| 19.69                       | 11.06                                                             | 11.45    | 14.82                                                             | 2.16     | 26.10                                                             |
| 19.03                       | 11.32                                                             | 11.33    | 14.89                                                             | 1.94     | 29.74                                                             |
| 18.58                       | 11.39                                                             | 11.10    | 15.02                                                             | 1.71     | 38.53                                                             |

|       |       |       |       |  |  |
|-------|-------|-------|-------|--|--|
| 18.27 | 11.52 | 10.96 | 15.04 |  |  |
|-------|-------|-------|-------|--|--|

The experimental binodal curves were fitted according to Equation 1 [3]:

$$[\text{CIL}] = A \exp[(B[\text{salt}]^{0.5}) - (C[\text{salt}]^3)] \quad (1)$$

where [CIL] and [salt] are the fraction percentages of CIL and salt, respectively. *A*, *B*, and *C* correspond to the fitting parameters.

**Table S8.** Merchuk equation parameters (*A*, *B* and *C*) and the respective standard deviations ( $\sigma$ ) for the ternary systems composed of IL, water and Na<sub>2</sub>SO<sub>4</sub> at 298 K, 323 K and 353 K ( $\pm 1$  K).

| IL                          | (T $\pm 1$ ) K | A $\pm \sigma$ | B $\pm \sigma$   | 10 <sup>5</sup> (C $\pm \sigma$ ) | R <sup>2</sup> |
|-----------------------------|----------------|----------------|------------------|-----------------------------------|----------------|
| [N <sub>4444</sub> ][Theob] | 298            | 78 $\pm$ 5     | -0.35 $\pm$ 0.04 | 18 $\pm$ 5                        | 0.9975         |
|                             | 323            | 89 $\pm$ 2     | -0.47 $\pm$ 0.01 | 26 $\pm$ 3                        | 0.9993         |
|                             | 353            | 87 $\pm$ 6     | -0.44 $\pm$ 0.04 | 48 $\pm$ 9                        | 0.9969         |
| [N <sub>4444</sub> ][Theop] | 298            | 89 $\pm$ 3     | -0.56 $\pm$ 0.02 | 46 $\pm$ 10                       | 0.9982         |
|                             | 323            | 93 $\pm$ 2     | -0.65 $\pm$ 0.01 | 124 $\pm$ 8                       | 0.9982         |
|                             | 353            | 74 $\pm$ 11    | -0.7 $\pm$ 0.1   | 355 $\pm$ 74                      | 0.9805         |
| [N <sub>4444</sub> ][Cl]    | 298            | 82 $\pm$ 2     | -0.50 $\pm$ 0.01 | 5x10 <sup>-9</sup> $\pm$ 2        | 0.9963         |
|                             | 323            | 81 $\pm$ 1     | -0.54 $\pm$ 0.01 | 5x10 <sup>-8</sup> $\pm$ 2        | 0.9993         |

**Table S9.** Merchuk equation parameters (*A*, *B* and *C*) and the respective standard deviations ( $\sigma$ ) for the ternary systems composed of IL, water and K<sub>3</sub>C<sub>5</sub>H<sub>6</sub>O<sub>7</sub> at (298  $\pm 1$ ) K.

| IL                          | (T $\pm 1$ ) K | A $\pm \sigma$ | B $\pm \sigma$     | 10 <sup>5</sup> (C $\pm \sigma$ ) | R <sup>2</sup> |
|-----------------------------|----------------|----------------|--------------------|-----------------------------------|----------------|
| [N <sub>4444</sub> ][Theob] | 298            | 105 $\pm$ 3    | -0.285 $\pm$ 0.001 | 2.7 $\pm$ 0.2                     | 0.9990         |
| [N <sub>4444</sub> ][Theop] | 298            | 94 $\pm$ 4     | -0.42 $\pm$ 0.02   | 14 $\pm$ 1                        | 0.9918         |

**Table S10.** Experimental TLs and TLLs of the ternary systems composed of ILs + Na<sub>2</sub>SO<sub>4</sub> at 298 K or 323 K ( $\pm 1$  K) and atmospheric pressure (0.1 MPa). No TLs were determined at (353  $\pm 1$ ) K.

| IL                          | (T $\pm 1$ ) K | Mixture point<br>(wt %) |        | Top phase<br>(wt %) |        |       | Bottom phase<br>(wt %) |        |       | TLL  |
|-----------------------------|----------------|-------------------------|--------|---------------------|--------|-------|------------------------|--------|-------|------|
|                             |                | [IL]                    | [salt] | [IL]                | [salt] | pH    | [IL]                   | [salt] | pH    |      |
| [N <sub>4444</sub> ][Theob] | 298            | 24.9                    | 10.1   | 35.0                | 4.9    | 11.46 | 2.8                    | 21.3   | 11.07 | 36.1 |
|                             |                | 25.0                    | 12.0   | 41.3                | 3.2    | 11.47 | 0.9                    | 25.0   | 10.98 | 45.9 |
|                             | 323            | 25.0                    | 10.0   | 36.0                | 3.6    | 11.43 | 0.2                    | 24.5   | 10.93 | 41.5 |
|                             |                | 25.0                    | 12.0   | 41.7                | 2.6    | 11.49 | 0.1                    | 26.0   | 11.02 | 47.7 |
| [N <sub>4444</sub> ][Theop] | 298            | 25.0                    | 5.6    | 39.1                | 2.1    | 9.86  | 13.3                   | 8.4    | 9.25  | 26.6 |
|                             |                | 24.7                    | 8.1    | 47.9                | 1.2    | 9.81  | 2.3                    | 14.8   | 9.32  | 47.6 |
|                             | 323            | 25.0                    | 5.5    | 49.2                | 1.0    | 9.82  | 4.8                    | 9.3    | 9.21  | 45.2 |
|                             |                | 25.1                    | 8.0    | 57.9                | 0.5    | 9.79  | 0.4                    | 13.7   | 9.26  | 59.1 |
| [N <sub>4444</sub> ][Cl]    | 298            | 25.0                    | 10.0   | 33.4                | 3.2    | 5.00  | 6.8                    | 24.7   | 4.88  | 34.2 |

**Table S11.** Experimental TLs and TLLs of the ternary systems composed of ILs + K<sub>3</sub>C<sub>5</sub>H<sub>6</sub>O<sub>7</sub> at (298  $\pm 1$ ) K and atmospheric pressure (0.1 MPa).

| IL                          | (T $\pm 1$ ) K | Mixture point<br>(wt%) |        | Top phase<br>(wt%) |        |       | Bottom phase<br>(wt%) |        |       | TLL  |
|-----------------------------|----------------|------------------------|--------|--------------------|--------|-------|-----------------------|--------|-------|------|
|                             |                | [IL]                   | [salt] | [IL]               | [salt] | pH    | [IL]                  | [salt] | pH    |      |
| [N <sub>4444</sub> ][Theob] | 298            | 25.0                   | 23.6   | 46.7               | 7.9    | 12.50 | 3.5                   | 39.1   | 11.95 | 53.2 |
|                             |                | 25.0                   | 28.5   | 59.4               | 4.0    | 12.70 | 1.2                   | 45.4   | 12.02 | 71.4 |
| [N <sub>4444</sub> ][Theop] | 298            | 25.1                   | 23.7   | 69.7               | 0.4    | 11.03 | 0.1                   | 36.8   | 10.44 | 78.6 |
|                             |                | 24.9                   | 14.1   | 56.2               | 1.5    | 11.20 | 1.6                   | 23.5   | 10.65 | 58.9 |

Ferulic acid was used to perform a simplistic study of its partition in different ternary mixtures. To perform this study, the following mixture points were used: [N<sub>4444</sub>][Theob]/[N<sub>4444</sub>][Cl]–Na<sub>2</sub>SO<sub>4</sub> (25–10) wt%, and [N<sub>4444</sub>][Theob]/[N<sub>4444</sub>][Theop]/[N<sub>4444</sub>][Cl]–K<sub>3</sub>C<sub>5</sub>H<sub>6</sub>O<sub>7</sub> (25–24) wt% at (298  $\pm 1$ ) K. The water content of each mixture point was substituted by an aqueous solution of ferulic acid with a concentration of 0.6 g·L<sup>-1</sup>. The mixture points were centrifuged for 20 min at 3500 rpm and the phases of the mixture points were separated and individually weighed ( $\pm 10^{-4}$  g). The amount of ferulic acid in each phase was determined by UV-Vis spectroscopy. All the assays were performed in duplicates. The extraction efficiency (EE) was determined as follows:

$$EE \% = \frac{m_{Top}}{m_{total}} \times 100$$

where  $m_{Top}$  is the amount of ferulic acid in the top phase, and  $m_{total}$  is the total amount of ferulic acid in the ternary mixture, respectively.

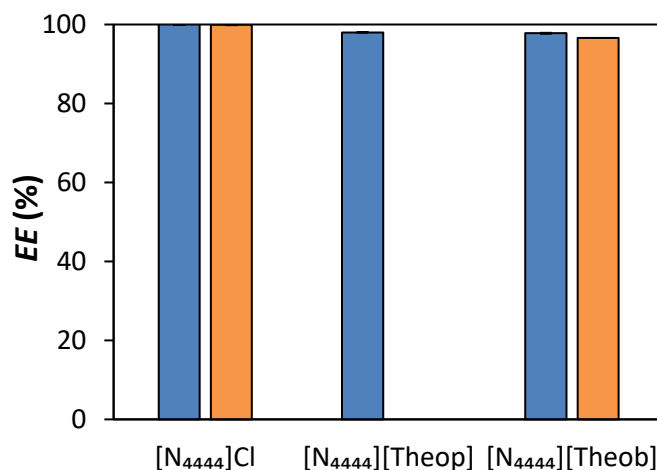

**Figure S3.** Extraction efficiency ( $EE\%$ ) of each ternary mixture at  $(289 \pm 1)$  K and atmospheric pressure (0.1 MPa). Blue bars represent data from systems containing the salting-out agent  $K_3C_5H_6O_7$  and orange bars represent ternary mixtures with  $Na_2SO_4$  as the salting-out agent.

**Table S12.** Molar solubility ( $S$ ) of ferulic acid in IL solutions with different concentrations.

| ILs                         | [IL] / (mol·L <sup>-1</sup> ) | ( $S \pm \sigma$ ) / (mol·L <sup>-1</sup> ) |
|-----------------------------|-------------------------------|---------------------------------------------|
| [N <sub>4444</sub> ][Theob] | 0.05                          | 0.0144 ± 0.0006                             |
|                             | 0.1                           | 0.0247 ± 0.0006                             |
|                             | 0.25                          | 0.12 ± 0.02                                 |
|                             | 0.5                           | 0.23 ± 0.01                                 |
| [N <sub>4444</sub> ][Theop] | 0.05                          | 0.0213 ± 0.0002                             |
|                             | 0.1                           | 0.063 ± 0.003                               |
|                             | 0.25                          | 0.237 ± 0.005                               |
|                             | 0.5                           | 0.46 ± 0.04                                 |
|                             | 1.0                           | 0.60 ± 0.01                                 |
|                             | 1.5                           | 0.38 ± 0.02                                 |
| [N <sub>4444</sub> ]Cl      | 0.05                          | 0.0040 ± 0.0001                             |
|                             | 0.1                           | 0.0047 ± 0.0001                             |
|                             | 0.25                          | 0.034 ± 0.001                               |
|                             | 0.5                           | 0.158 ± 0.003                               |
|                             | 1.0                           | 0.415 ± 0.009                               |
|                             | 1.5                           | 0.24 ± 0.01                                 |

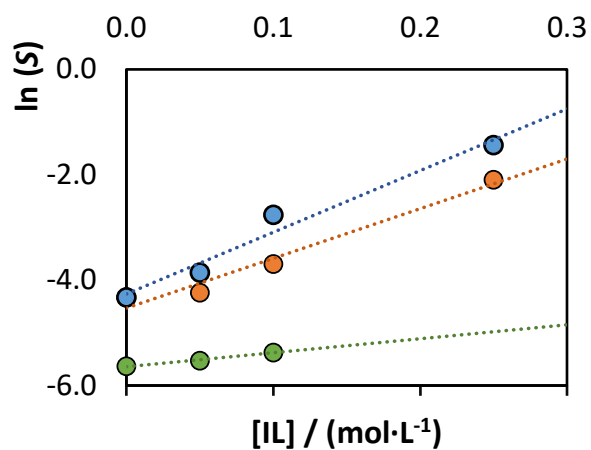

**Figure S4.** Fitted regression to the diluted region solubility data for the determination of the Setschenow constant. Different ILs are represented in different colors: [N<sub>4444</sub>][Theop] (blue), [N<sub>4444</sub>][Theob] (orange) and [N<sub>4444</sub>]Cl (green).

**Table S13.** Setchenow constant for each IL, given by the slope of the fitted regression to the diluted region solubility data, and the respective coefficient of determination ( $R^2$ ).

| IL                          | Setschenow constant<br>(L·mol <sup>-1</sup> ) | $R^2$  |
|-----------------------------|-----------------------------------------------|--------|
| [N <sub>4444</sub> ][Theob] | 9.440                                         | 0.9714 |
| [N <sub>4444</sub> ][Theop] | 11.710                                        | 0.9681 |
| [N <sub>4444</sub> ]Cl      | 2.657                                         | 0.9900 |

**Table S14.** Measured pH of the IL solutions before the addition of ferulic acid and after obtaining a saturated solution.

| IL                          | [IL] / (mol·L <sup>-1</sup> ) | Initial solution pH | Saturated solution pH |
|-----------------------------|-------------------------------|---------------------|-----------------------|
| [N <sub>4444</sub> ][Theob] | 0.05                          | 10.85               | 5.36                  |
|                             | 0.1                           | 11.56               | 5.54                  |
|                             | 0.25                          | 11.80               | 8.51                  |
|                             | 0.5                           | 11.98               | 9.62                  |
| [N <sub>4444</sub> ][Theop] | 0.05                          | 8.91                | 5.30                  |
|                             | 0.1                           | 10.52               | 6.44                  |
|                             | 0.25                          | 10.81               | 6.56                  |
|                             | 0.5                           | 10.78               | 7.65                  |
|                             | 1.0                           | 11.06               | 8.63                  |
|                             | 1.5                           | 10.68               | 9.95                  |
| [N <sub>4444</sub> ]Cl      | 0.05                          | 5.71                | 3.29                  |
|                             | 0.1                           | 6.31                | 2.89                  |
|                             | 0.25                          | 5.62                | 2.63                  |
|                             | 0.5                           | 4.26                | 2.36                  |
|                             | 1.0                           | 4.04                | 2.10                  |
|                             | 1.5                           | 4.20                | 2.26                  |

**Table S15.** Ferulic acid water-solubility at different pH values.

| Initial solution pH | Saturated solution pH | (Solubility ± σ) × 10 <sup>2</sup> (mol·L <sup>-1</sup> ) |
|---------------------|-----------------------|-----------------------------------------------------------|
| 2.46                | 2.45                  | 0.355 ± 0.006                                             |
| 7.04                | 3.60                  | 0.39 ± 0.02                                               |
| 11.63               | 4.70                  | 0.94 ± 0.02                                               |
| 11.78               | 5.05                  | 1.32 ± 0.04                                               |
| 12.59               | 5.78                  | 7.3 ± 0.6                                                 |
| 13.01               | 6.11                  | 38 ± 1                                                    |
| 13.16               | 7.93                  | 35 ± 2                                                    |
| 13.01               | 8.57                  | 33 ± 1                                                    |
| 13.16               | 9.16                  | 31 ± 2                                                    |

## References

1. PubChem Available online: <https://pubchem.ncbi.nlm.nih.gov/> (accessed on Mar 8, 2021).
2. MarvinSketch 21.14, 2021, ChemAxon Available online: <http://www.chemaxon.com> (accessed on Apr 5, 2021).
3. Merchuk, J.C.; Andrews, B.A.; Asenjo, J.A. Aqueous two-phase systems for protein separation studies on phase inversion. *J. Chromatogr. B Biomed. Appl.* **1998**, *711*, 285–293, doi:10.1016/S0378-4347(97)00594-X.
